# Supplementary material
Source: publisher figshare collection journal article supplement (https://acs.figshare.com/ndownloader/files/4006429)
Supplement: Supplementary file 1 [file 4006429]

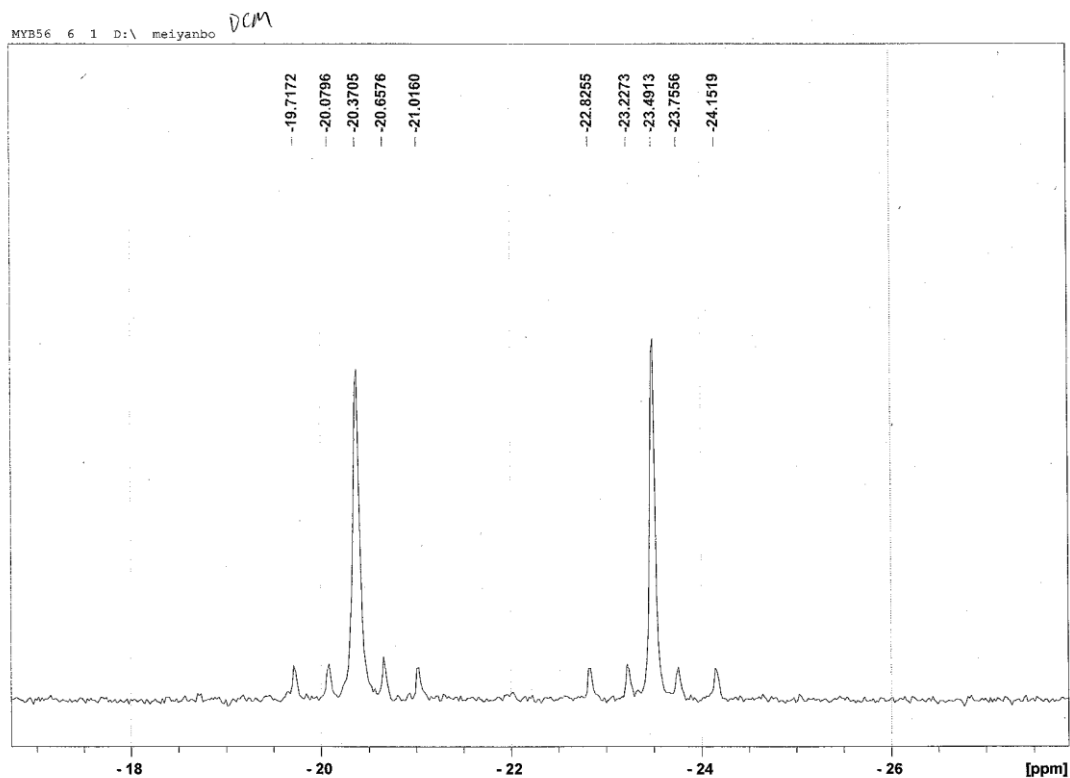

$^{31}\text{P}$  NMR of compound 2a

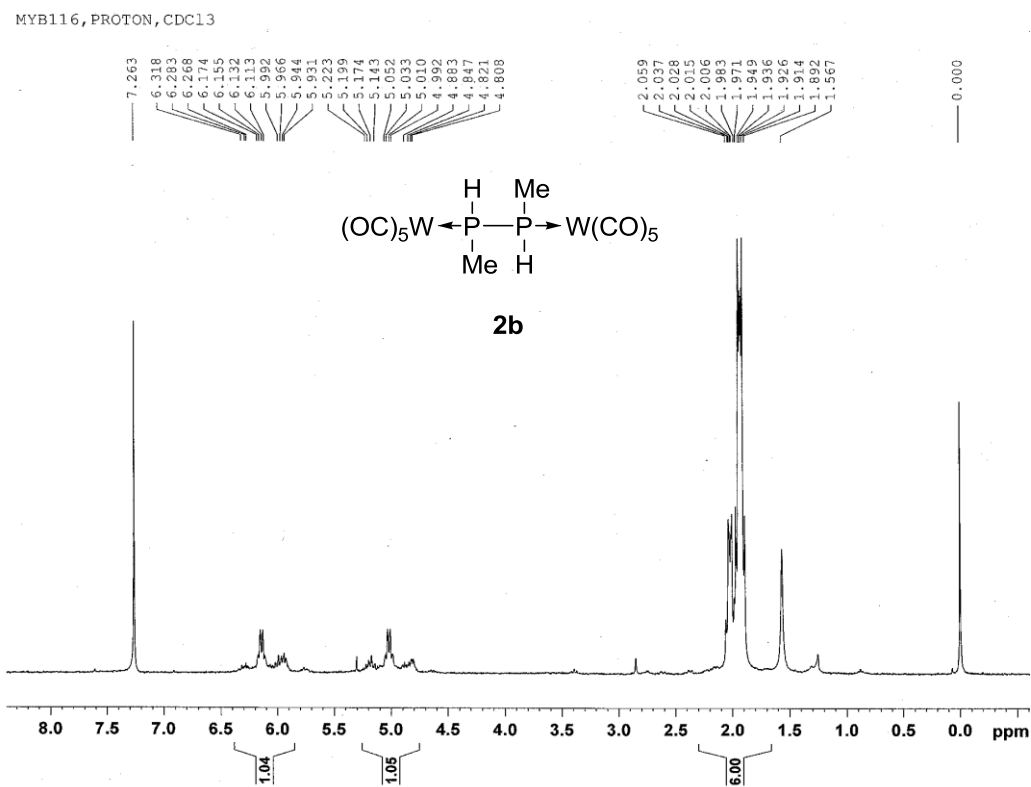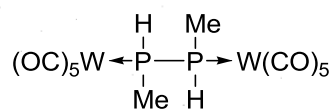

2b

$^1\text{H}$  NMR of compound 2b

MYB116, C13CPD, CDC13

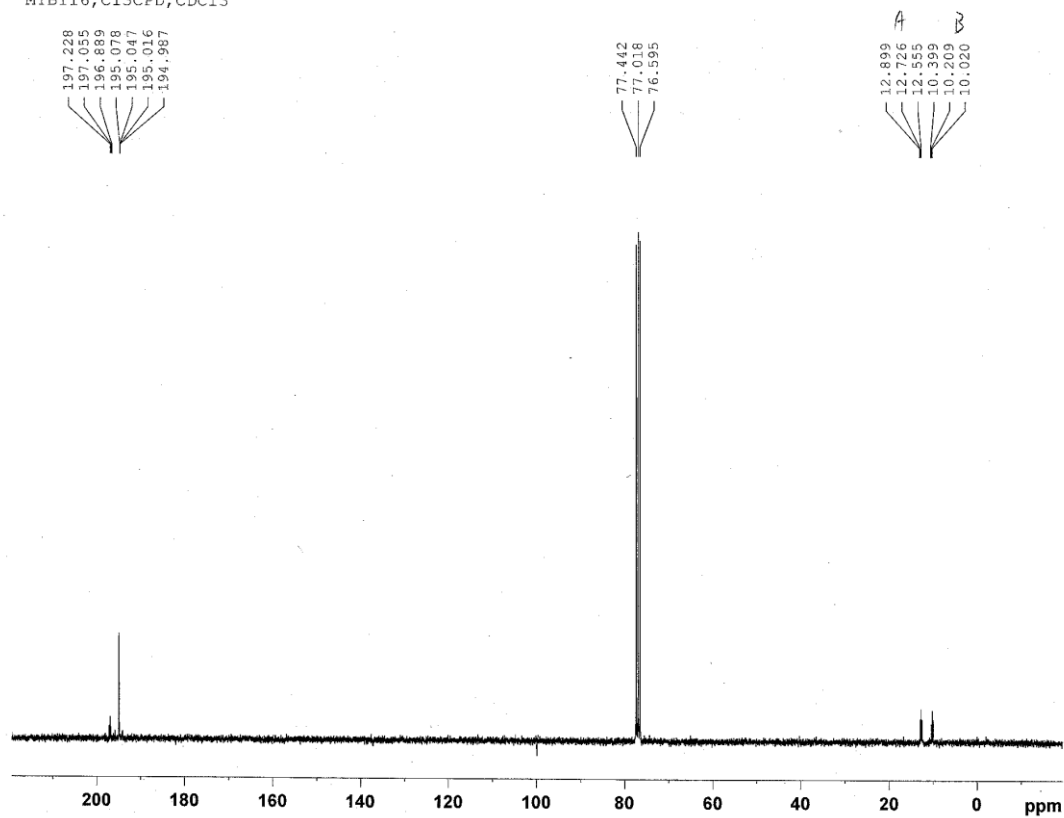

$^{13}\text{C}$  NMR of compound 2b

MYB116, P31CPD  $\text{CDCl}_3$

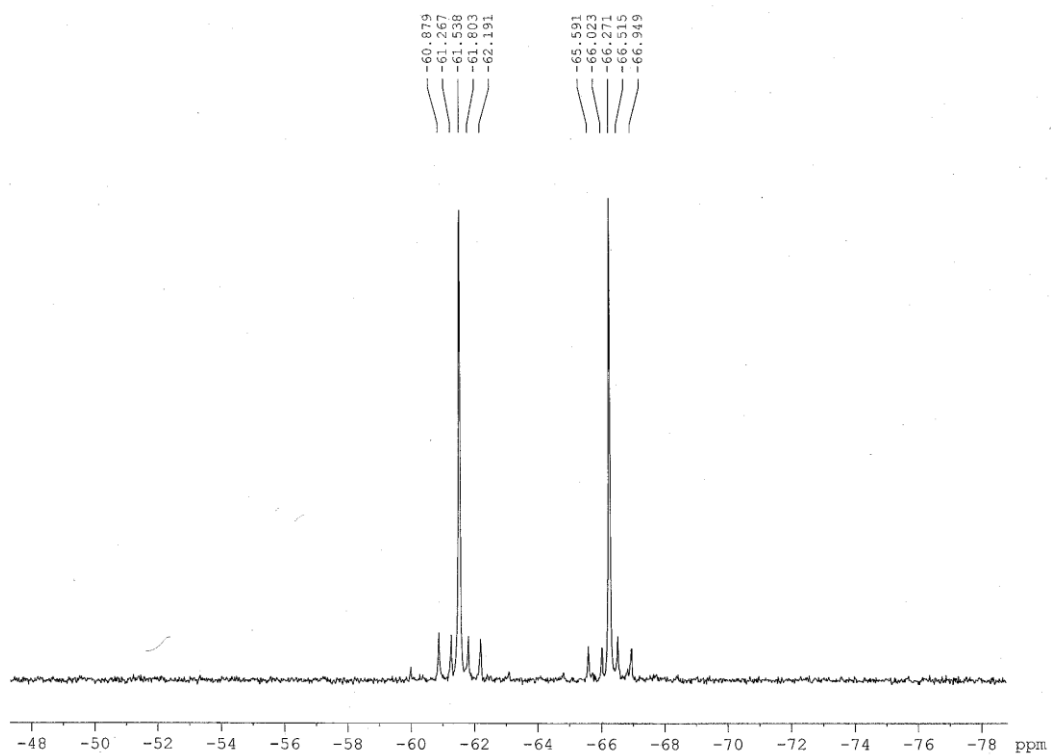

$^{31}\text{P}$  NMR of compound 2b

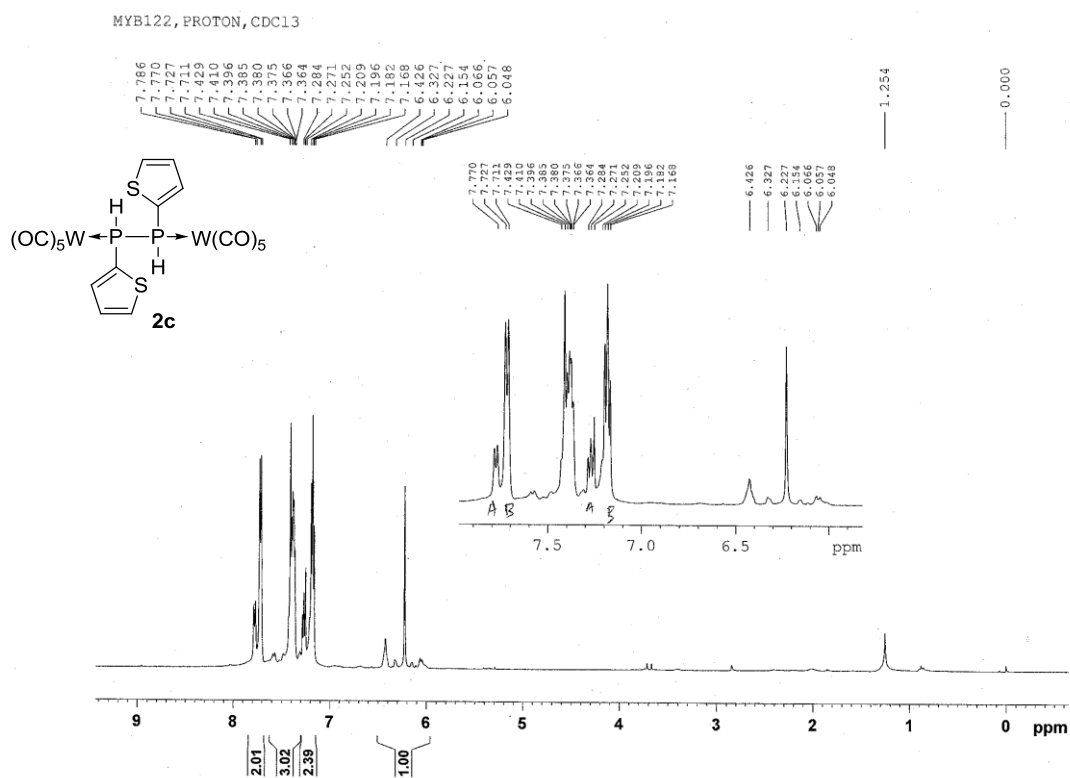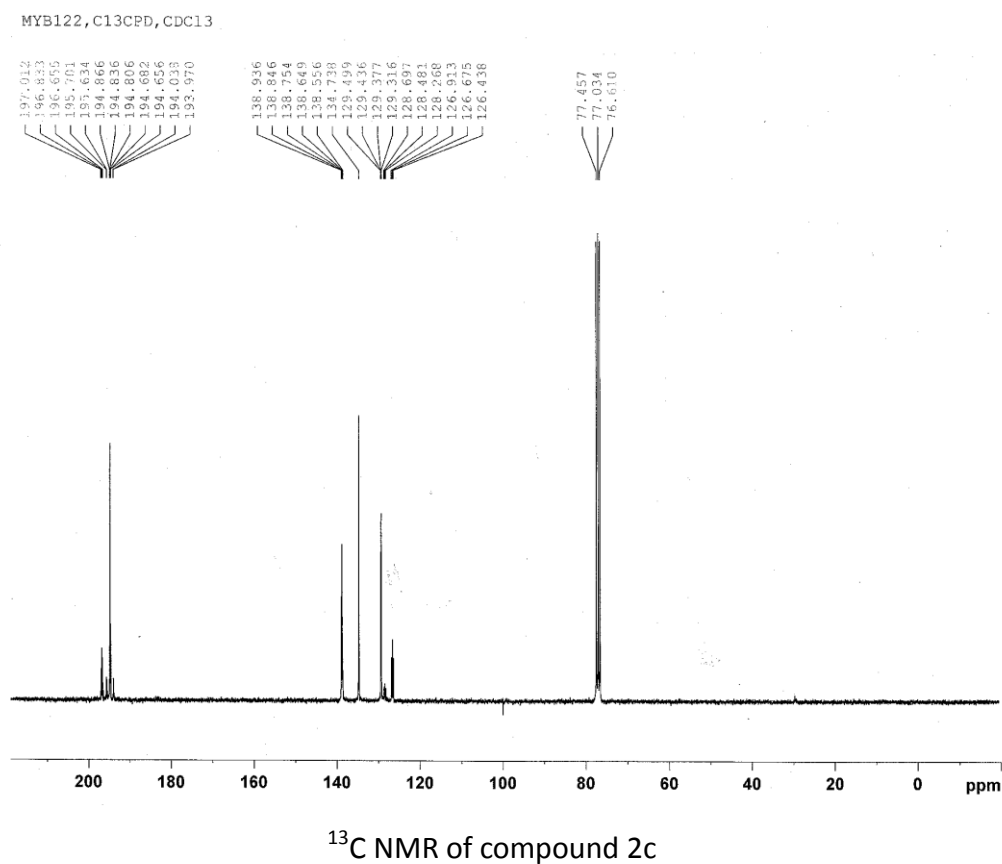

MYB122, P31

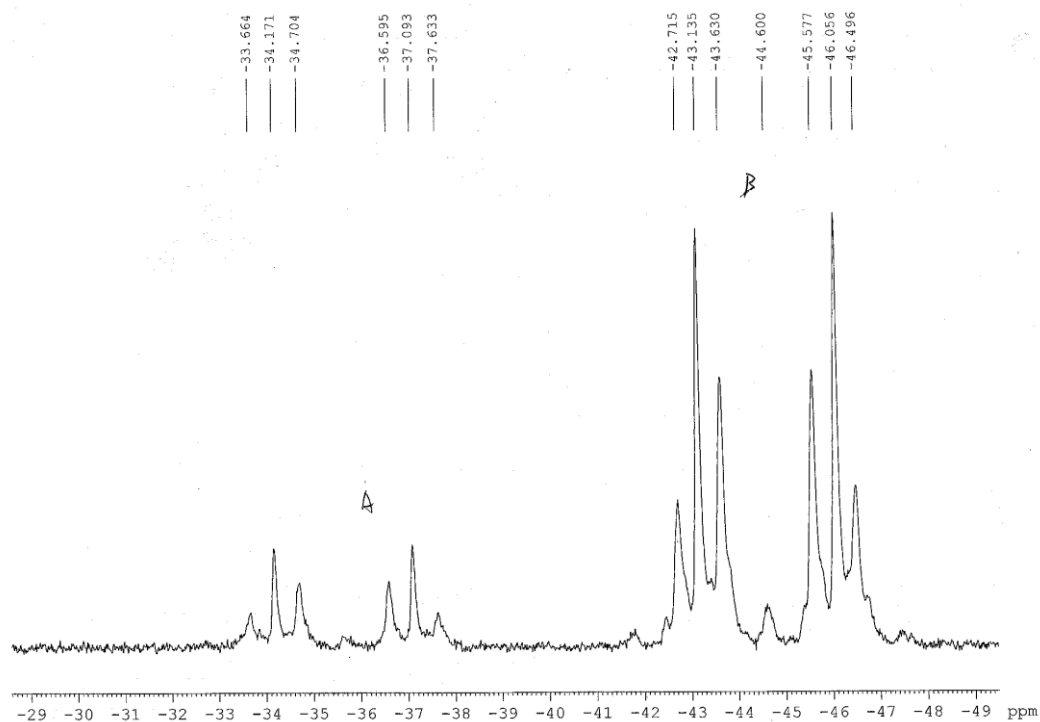

<sup>31</sup>P NMR of compound 2c (P-H coupling)

MYB122 P31CPD CDC13

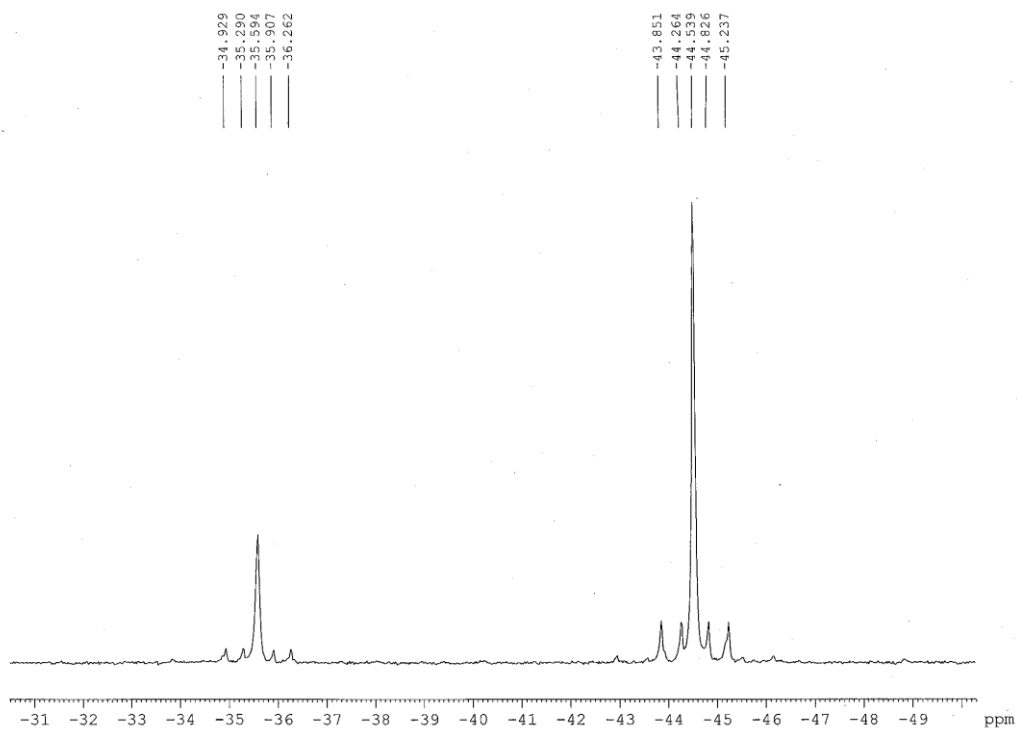

<sup>31</sup>P NMR of compound 2c

PROTON

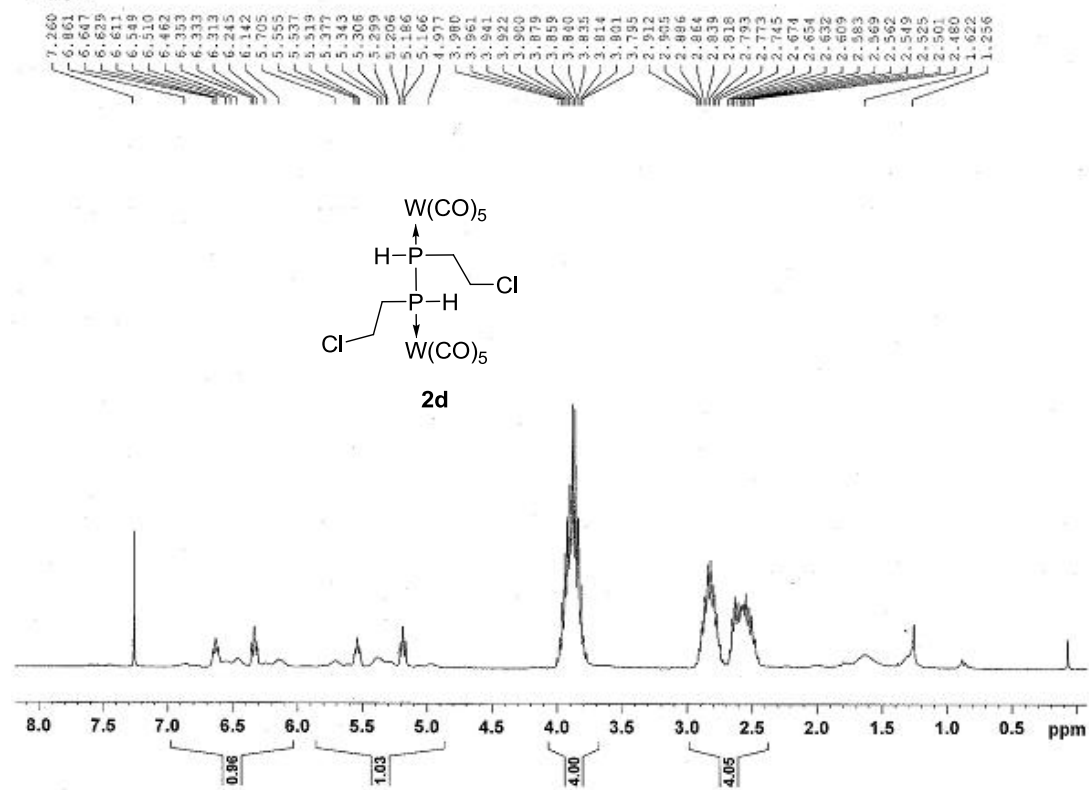

<sup>1</sup>H NMR of compound 2d

MYB174, C13CPD, CDC13

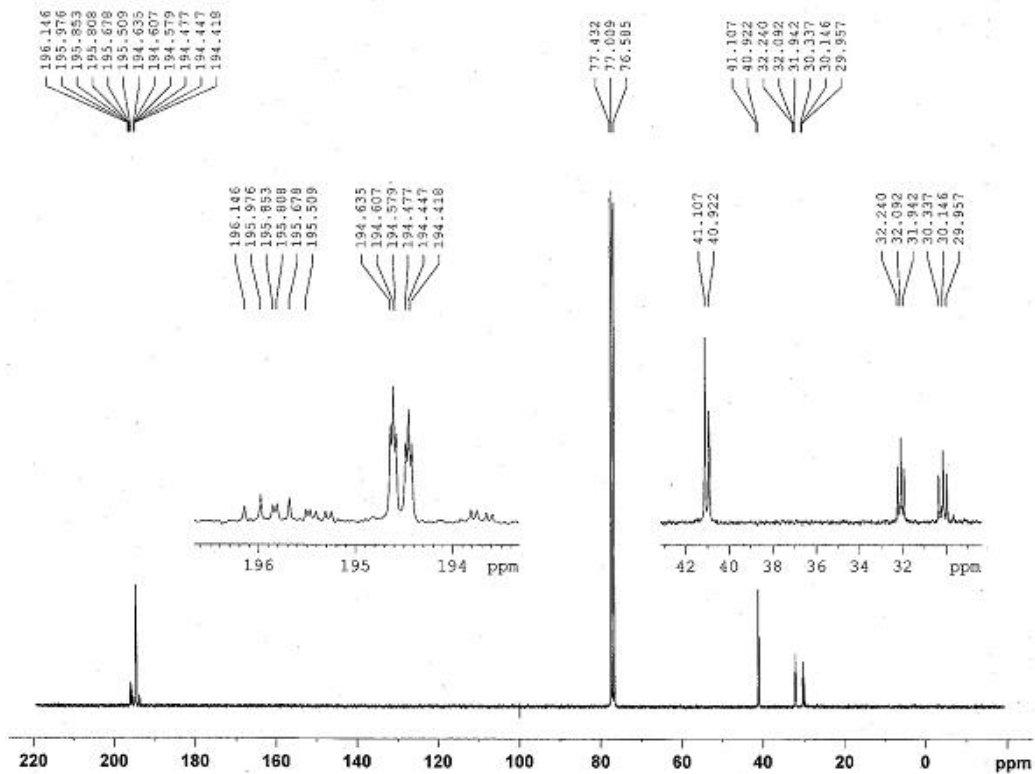

<sup>13</sup>C NMR of compound 2d

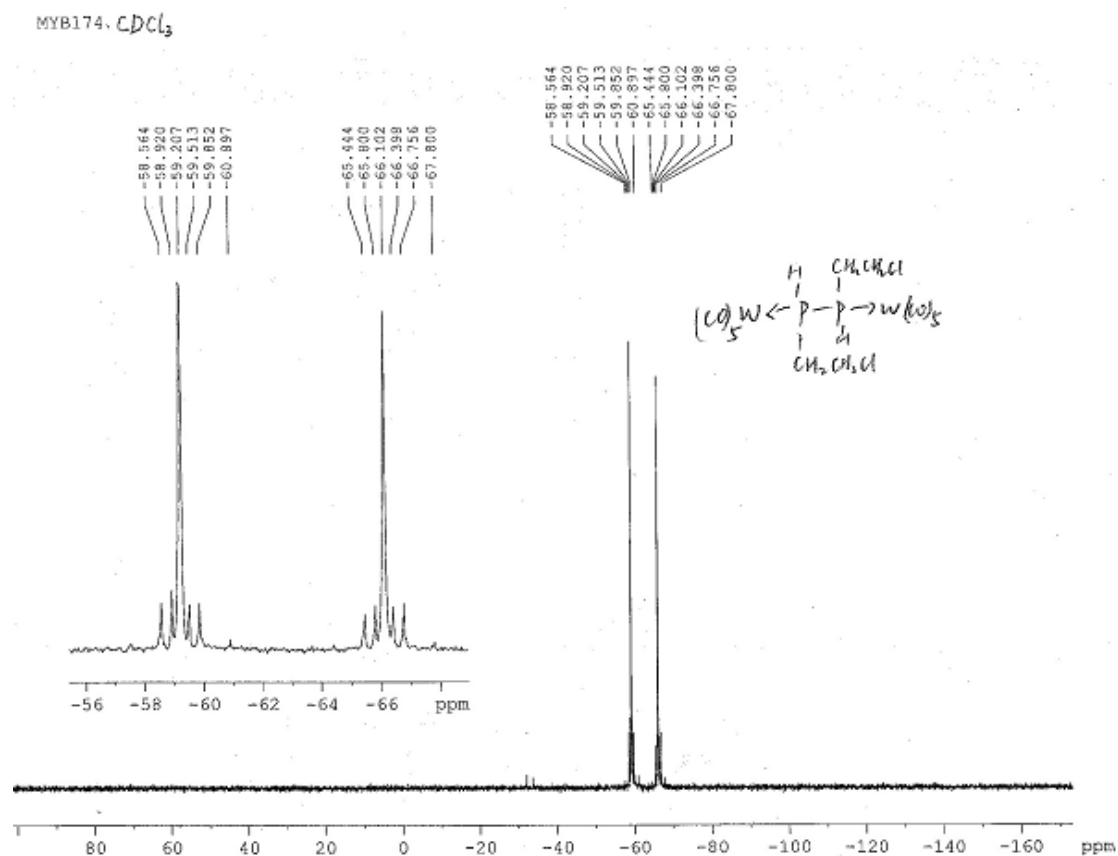

<sup>31</sup>P NMR of compound 2d

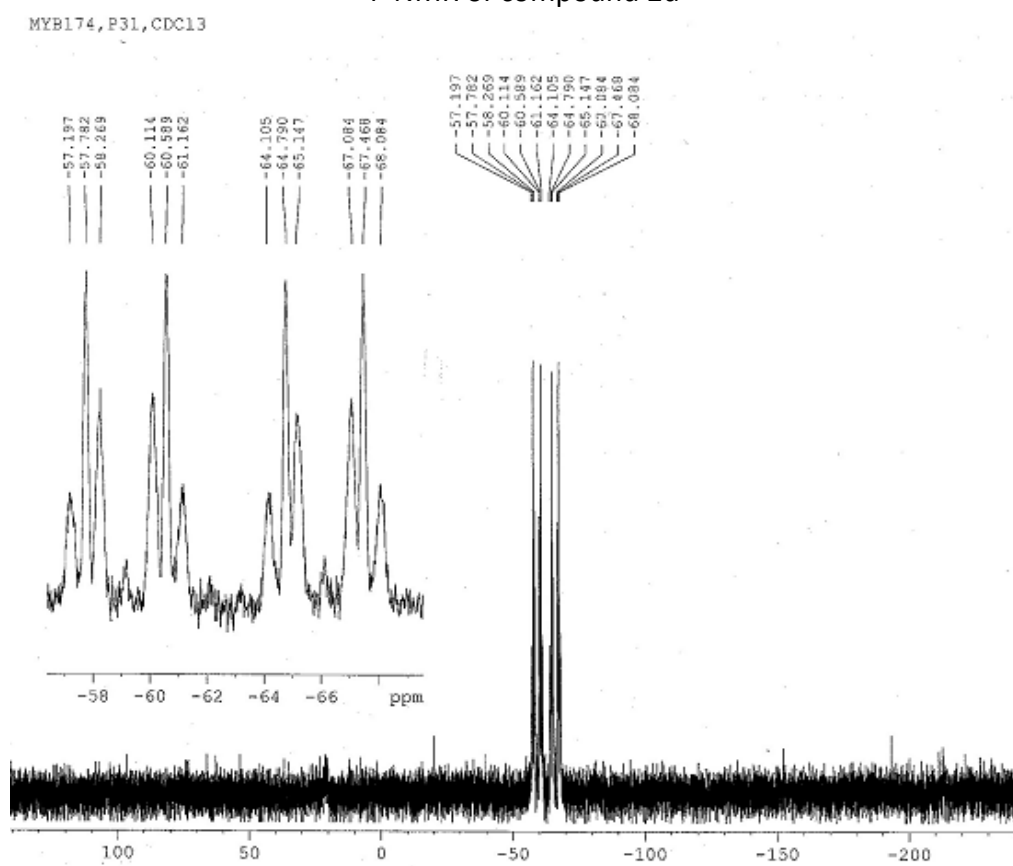

<sup>31</sup>P NMR of compound 2d (P-H coupling)

MYB112, the third band, PROTON, CDCl3

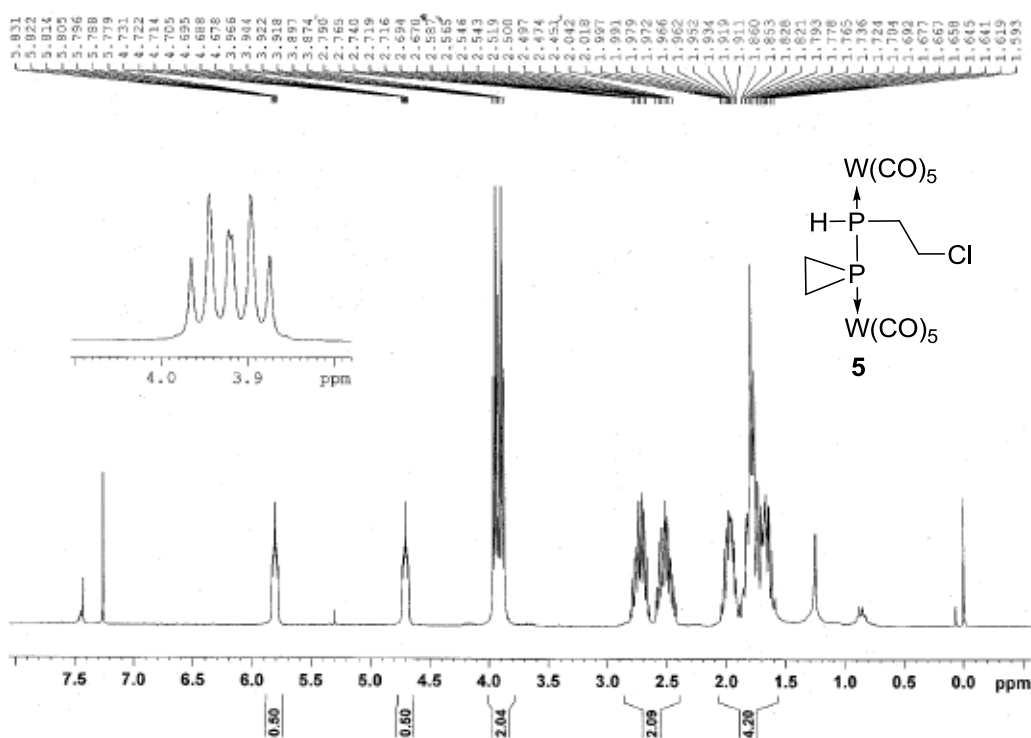

<sup>1</sup>H NMR of compound 5

MYB112, THE THIRD, C13CPD, CDCl3

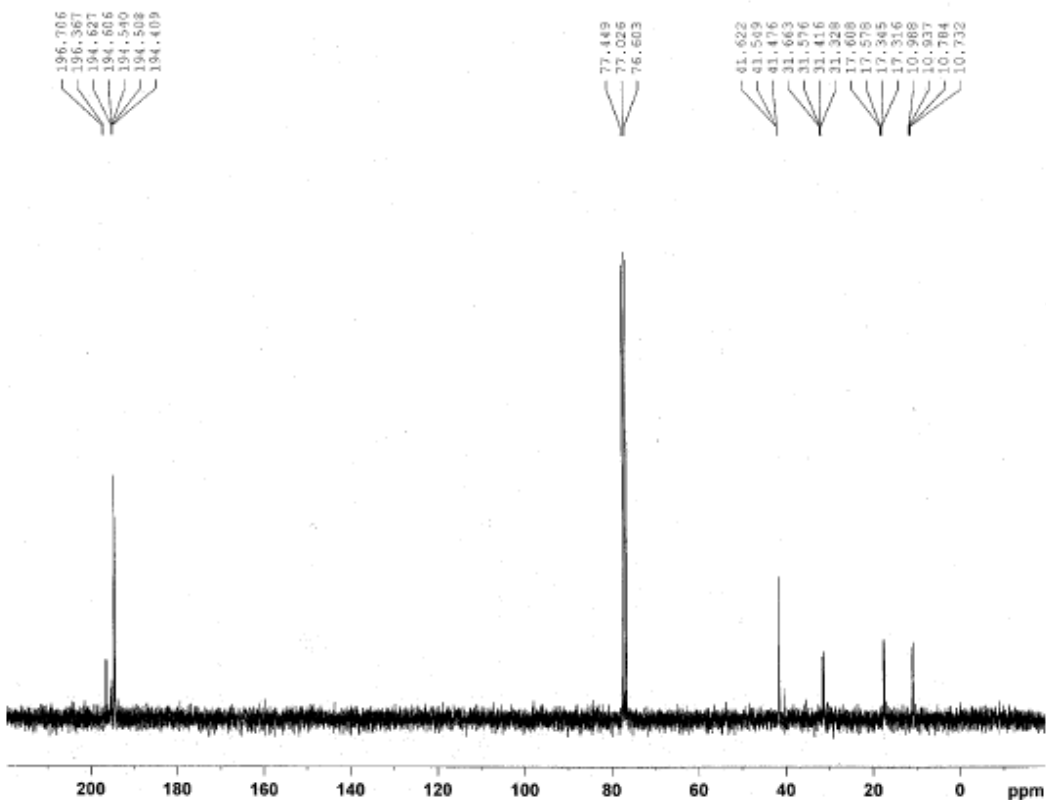

<sup>13</sup>C NMR of compound 5



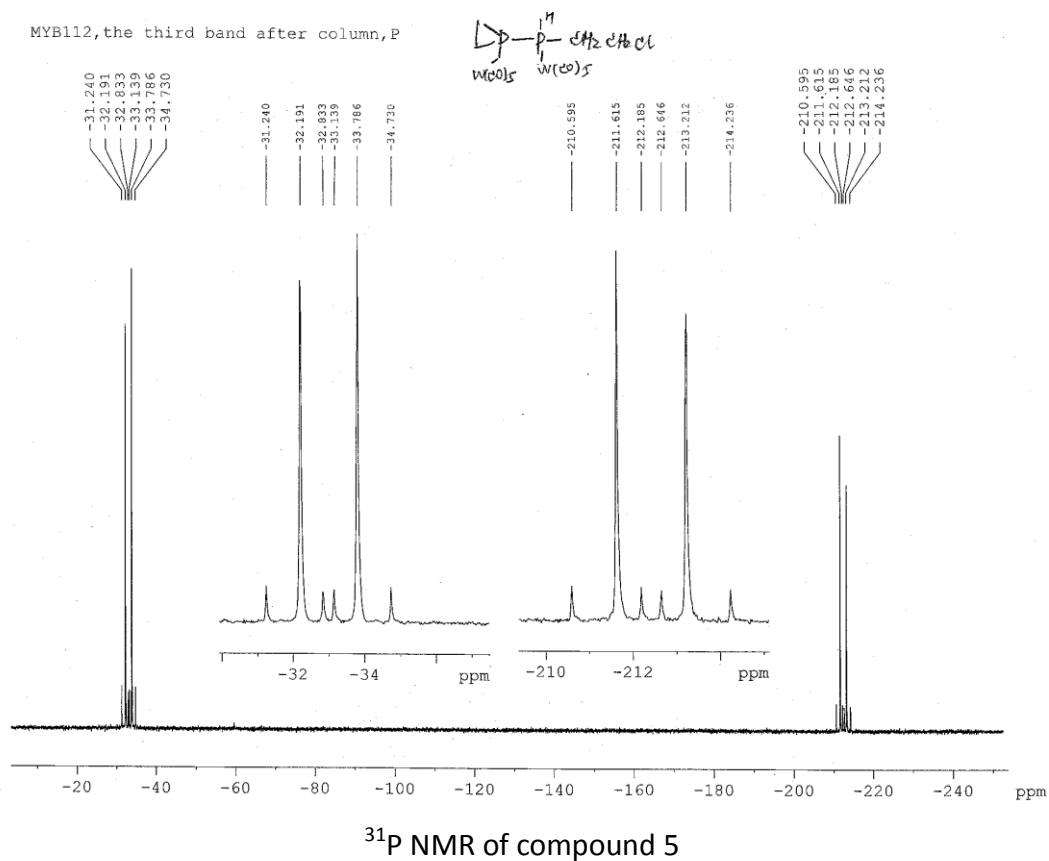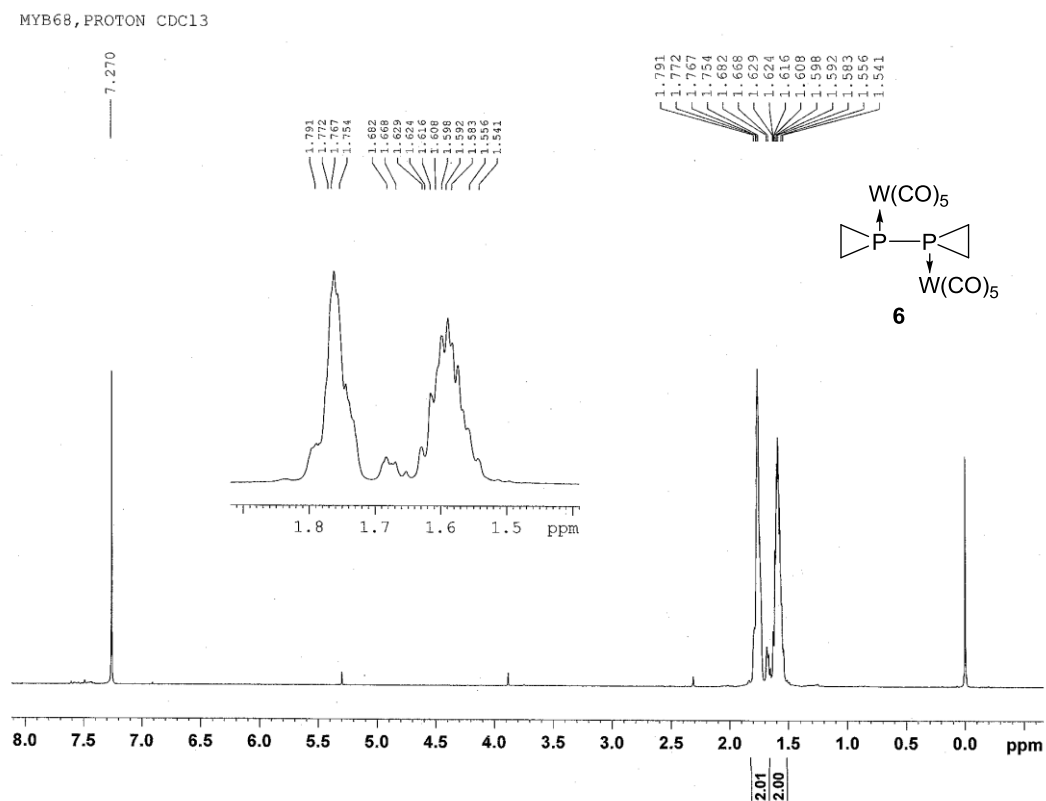

MYB68, C13 CDCl3

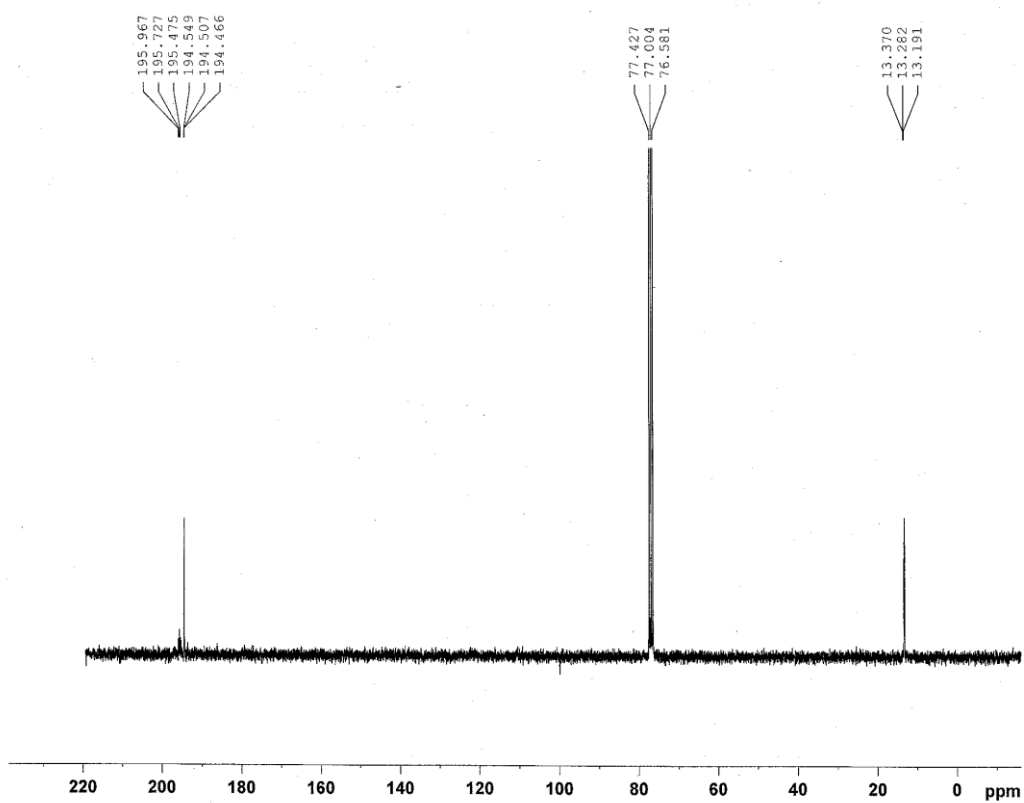

<sup>13</sup>C NMR of compound 6

MYB68, 31PCPD, CDCl3

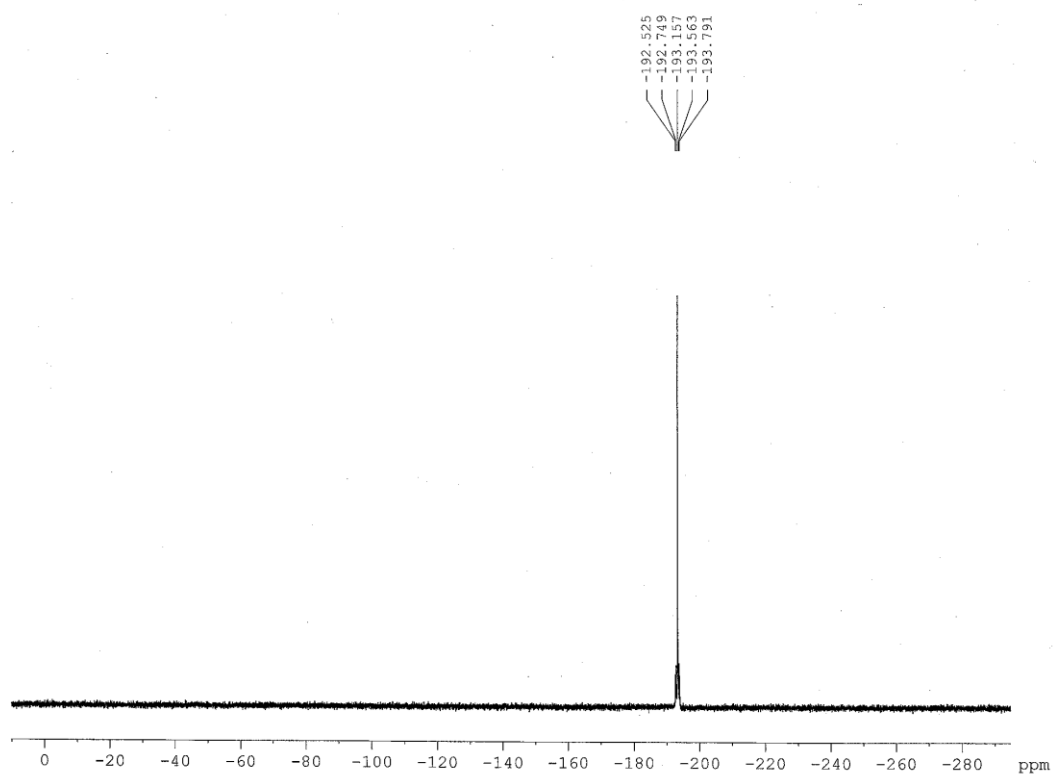

<sup>31</sup>P NMR of compound 6

MYB143, PROTON, CDCl<sub>3</sub>

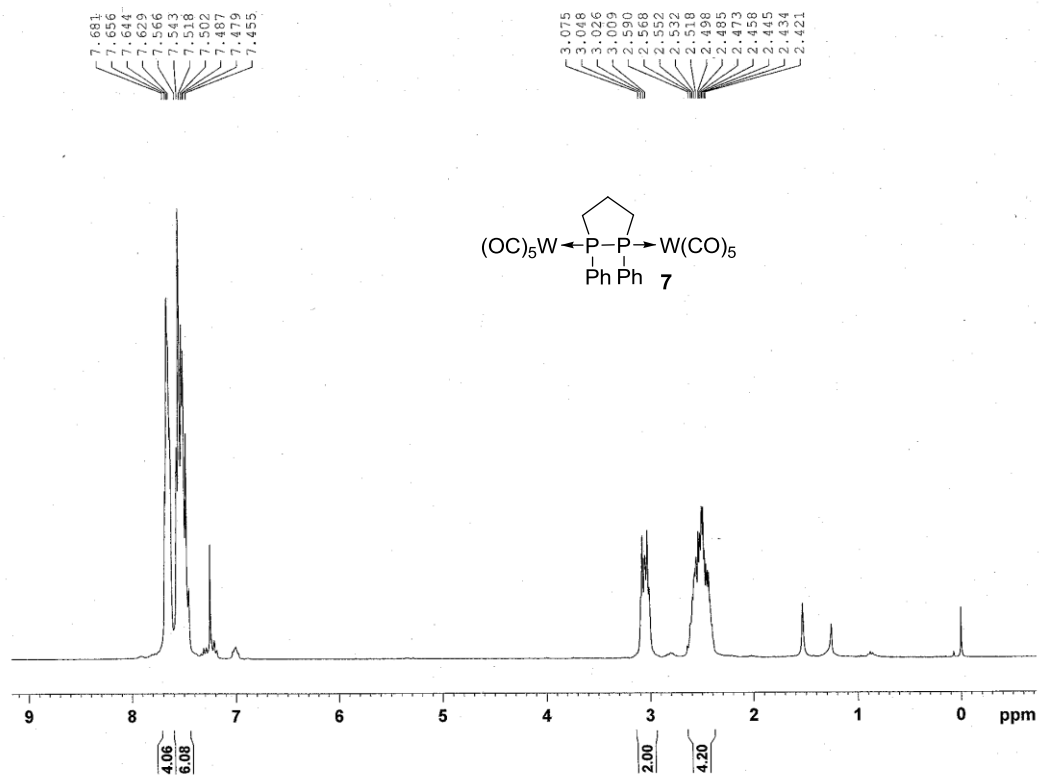

<sup>1</sup>H NMR of compound 7

MYB143, C13CPD, CDCl<sub>3</sub>

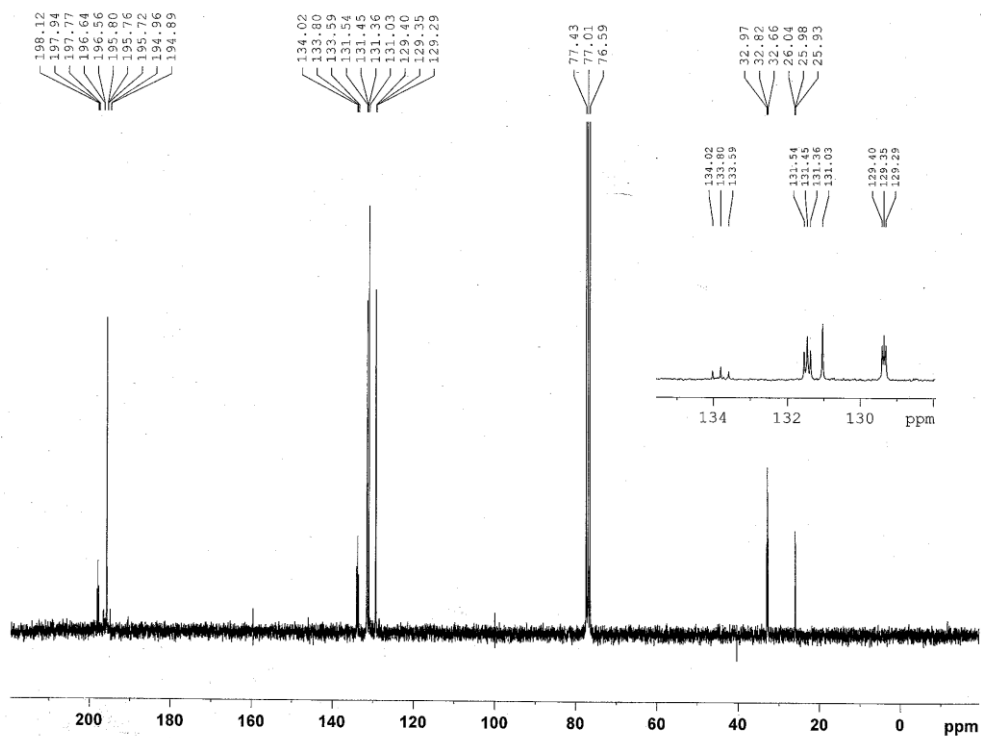

<sup>13</sup>C NMR of compound 7

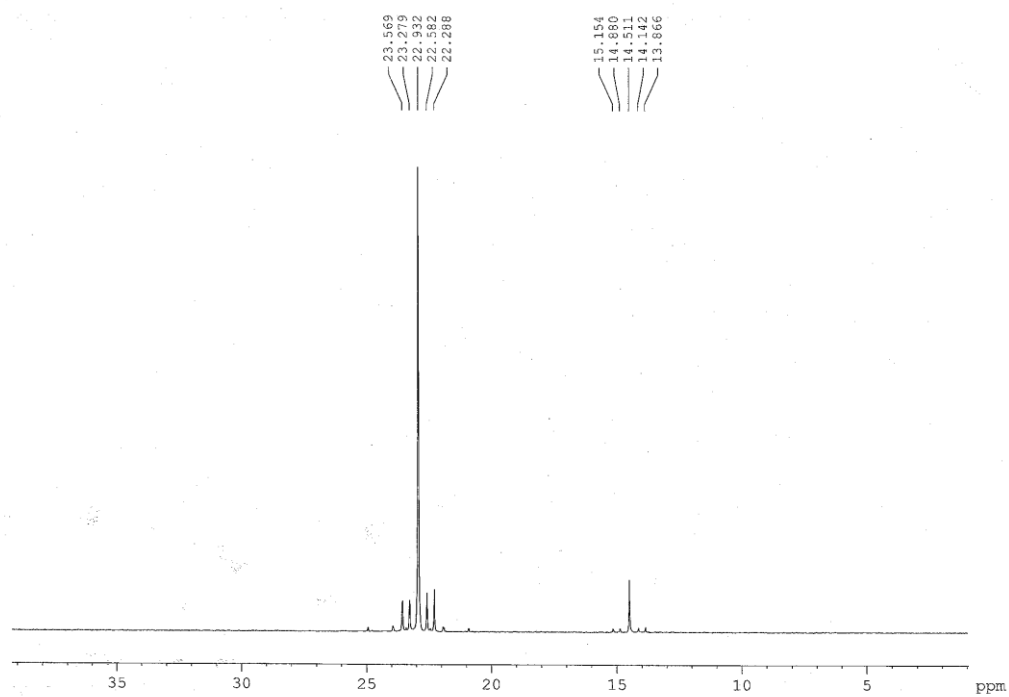

$^{31}\text{P}$  NMR of compound 7

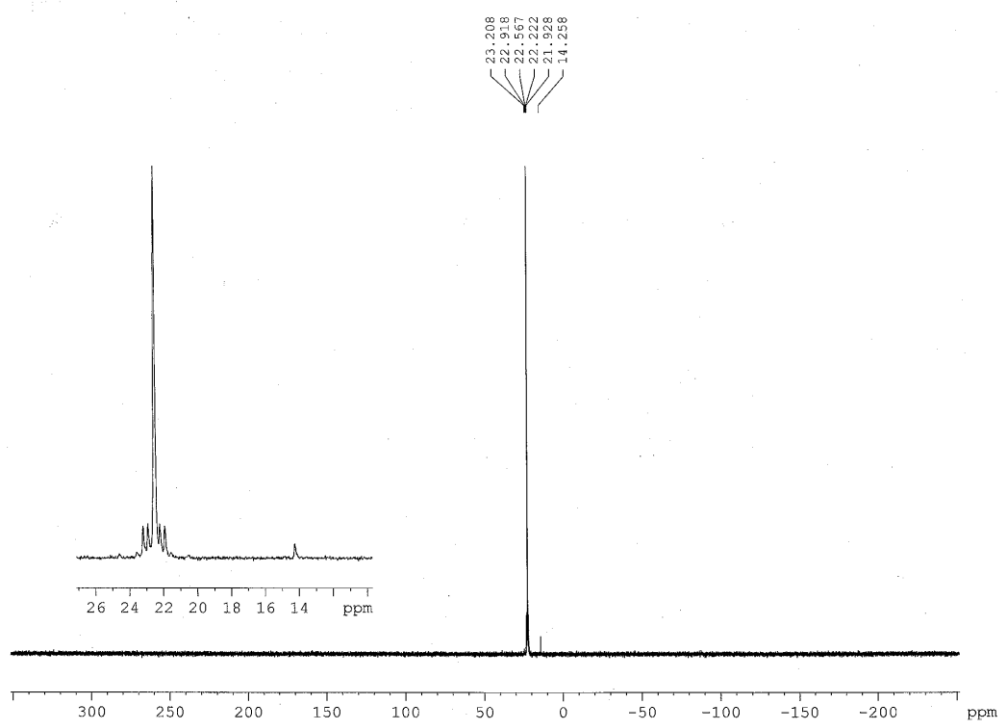

$^{31}\text{P}$  NMR of compound 7
